# Supplementary material
Source: PubMed Central journal article supplement (PMC8638403)

## Supplemental Table of Contents

### Conversion from calcineurin inhibitor- to belatacept-based maintenance immunosuppression in renal transplant recipients: a randomized phase 3b trial

- **IM103-116 investigators and recruitment numbers.**
- **Supplemental Table S1.** Baseline serum creatinine concentrations (mg/dL) by baseline eGFR and race.
- **Supplemental Table S2.** Serum trough concentrations of tacrolimus and cyclosporine at study entry (all patients) and during the trial period (CNI continuation arm only).
- **Supplemental Table S3.** Patient and graft survival at 24 months in patient subgroups.
- **Supplemental Table S4.** BPAR at 24 months in patient subgroups.
- **Supplemental Table S5.** Improvement from baseline in eGFR.
- **Supplemental Table S6.** Urine protein-to-creatinine ratio at baseline and at month 24.
- **Supplemental Table S7.** Impact on donor-specific antibodies.
- **Supplemental Figure S1.** Subgroup analyses of change in eGFR from baseline to month 24.
- **Supplemental Figure S2.** Impact of BPAR on eGFR over time with imputation.

**IM103-116 investigators and recruitment numbers.**

| Country       | Investigator             | Affiliation                                                                           | Patients enrolled, n |
|---------------|--------------------------|---------------------------------------------------------------------------------------|----------------------|
| United States | Rohini Prashar           | Henry Ford's Transplant Institute                                                     | 53                   |
| Germany       | Hermann Haller           | MHH—Medizinische Hochschule Hannover; Klinik fuer Nieren und Hochdruckerkrankungen    | 49                   |
| Germany       | Klemens Budde            | Charité—Universitaetsmedizin Berlin—Campus Charité Mitte (CCM)                        | 35                   |
| Argentina     | Maria C. Vazquez         | Sanatorio Parque Rosario                                                              | 27                   |
| France        | Nassim Kamar             | CHU Rangueil                                                                          | 18                   |
| United States | Arjang Djamali           | University of Wisconsin School of Medicine and Public Health                          | 18                   |
| United States | Avinash Agarwal          | University of Virginia Health System                                                  | 17                   |
| Netherlands   | Johan W. de Fijter       | Leids Universitair Medisch Centrum (LUMC)                                             | 16                   |
| Argentina     | Maria C. Rial            | Instituto de Nefrologia, Nephrology S.A.                                              | 15                   |
| France        | Lionel Rostaing          | Centre Hospitalier Universitaire de Grenoble-Hôpital Albert Michallon                 | 15                   |
| United States | Nicolae Leca             | University of Washington Medical Center                                               | 15                   |
| Argentina     | Luis Gaité               | Clínica de Nefrología, Urología y Enfermedades Cardiovasculares                       | 14                   |
| Netherlands   | Stefan P. Berger         | University Medical Center Groningen                                                   | 14                   |
| United States | Debra L. Sudan           | Duke University Medical Center                                                        | 13                   |
| Colombia      | Camilo Montero           | Clínica Colsanitas S.A.<br>Sede Clínica Universitaria Colombia                        | 12                   |
| United States | Richard Knight           | The Methodist Hospital                                                                | 12                   |
| United States | Stephen Jensik           | RUSH University Transplant Program                                                    | 12                   |
| United States | Thomas McCune            | Sentara Norfolk General Hospital                                                      | 11                   |
| United States | Sanjay Kulkarni          | Yale Medical Group                                                                    | 11                   |
| Austria       | Bruno Watschinger        | Medizinische Universität Wien<br>AKH - Allgemeines Krankenhaus Wien                   | 10                   |
| United States | Flavio Vincenti          | UCSF Medical Center                                                                   | 10                   |
| Austria       | Karl Lhotta              | Academic Teaching Hospital Feldkirch                                                  | 9                    |
| Germany       | Oliver Witzke            | Universitaetsklinikum Essen, Klinik fuer Nephrologie, Medizinisches Forschungszentrum | 9                    |
| Germany       | Bernhard Banas           | University Hospital Regensburg                                                        | 8                    |
| Germany       | Michael Wiesener         | Klinikum Erlangen der Friedrich-Alexander-Universitaet Erlangen-Nuernberg             | 8                    |
| United States | Stephan Pastan           | Emory University                                                                      | 8                    |
| United States | John Vella               | Maine Transplant Program                                                              | 8                    |
| United States | Samer H. Bani Hani       | Providence Sacred Heart Medical Center and Children's Hospital                        | 8                    |
| United States | Shirley Shwu-Shiow Chang | University of Buffalo                                                                 | 8                    |
| Argentina     | Rafael Maldonado         | Clínica Privada Vélez Sarsfield                                                       | 7                    |
| Argentina     | Ruben Schiavelli         | Hospital General de Agudos Dr. Cosme Argerich                                         | 7                    |
| Argentina     | Gervasio Soler Pujol     | CEMIC Las Heras Hospital                                                              | 7                    |
| United States | Arman Faravardeh         | California Institute of Renal Research                                                | 7                    |

| Country       | Investigator               | Affiliation                                                                                                                                        | Patients enrolled, n |
|---------------|----------------------------|----------------------------------------------------------------------------------------------------------------------------------------------------|----------------------|
| Argentina     | Jorge De La Fuente         | Hospital Privado Centro Médico de Cordoba S.A.                                                                                                     | 6                    |
| Argentina     | Pablo Raffaele             | Fundación Favalaro, Hospital Universitario Fundación Favalaro                                                                                      | 6                    |
| France        | Pierre Merville            | Hôpital Pellegrin-Tripode<br>Département Néphrologie                                                                                               | 6                    |
| Germany       | Thorsten Feldkamp          | Universitaetsklinikum Schleswig-Holstein Campus Kiel                                                                                               | 6                    |
| Netherlands   | S.A. Nurmohamed            | VU University Medical Center                                                                                                                       | 6                    |
| United States | Paul Bolin                 | East Carolina University Nephrology Clin Research Lab                                                                                              | 6                    |
| United States | Mohamed Ahmed El-Ghoroury  | St. Clair Nephrology Research, St. John Medical Center—<br>Renaissance Renal Research Institute                                                    | 6                    |
| United States | Tariq Shah                 | Transplant Research Institute                                                                                                                      | 6                    |
| United States | Bernard Fischbach          | Baylor All Saints Medical Center at Ft. Worth                                                                                                      | 6                    |
| Austria       | Gert Mayer                 | Universitätsklinik Innsbruck                                                                                                                       | 5                    |
| France        | Antoine Durrbach           | APHP Bicêtre Hospital, Nephrology Department                                                                                                       | 5                    |
| France        | Dominique Bertrand         | Hospital Center University Rouen                                                                                                                   | 5                    |
| Switzerland   | Uyen Huynh-Do              | INSELSPITAL Bern, Universitaetsspital Bern Departement<br>DURN Klinik fuer Nephrologie, Hypertonie und Klinische<br>Pharmakologie                  | 5                    |
| United States | Bradley Marder             | Denver Nephrologists, PC                                                                                                                           | 5                    |
| United States | Harold Helderman           | Vanderbilt University Medical Center, GI Research Office                                                                                           | 5                    |
| Argentina     | Federico Cicora            | Hospital Aleman                                                                                                                                    | 4                    |
| France        | Yannick Le Meur            | CHU de Brest, Centre d'investigation clinique, Hôpital De La<br>Cavale Blanche                                                                     | 4                    |
| Germany       | Bernd Krueger              | University Hospital Mannheim                                                                                                                       | 4                    |
| Germany       | Barbara Suwelack           | University Hospital of Muenster, UKM Med D TX<br>Nephrology                                                                                        | 4                    |
| Germany       | Lutz Renders               | Klinikum Rechts der Isar der Technischen Universitaet<br>Muenchen                                                                                  | 4                    |
| United States | Ram Peddi                  | California Pacific Medical Center, Department of<br>Transplantation                                                                                | 4                    |
| United States | Kim M. Rice                | Baylor University Medical Center                                                                                                                   | 4                    |
| France        | Emmanuel Morelon           | Hôpital Edouard Herriot                                                                                                                            | 3                    |
| Germany       | Ingeborg A. Hauser         | Universitaetsklinik der Johann Wolfgang Goethe-<br>Universitaet                                                                                    | 3                    |
| United States | Ehab Saad                  | Medical College of WI Froedtert Hospital                                                                                                           | 3                    |
| United States | Maria Aurora Posadas Salas | Medical University of South Carolina, SCTR Research Nexus                                                                                          | 3                    |
| United States | Yasir Qazi                 | Keck Medical Center of USC                                                                                                                         | 3                    |
| United States | Karthik Ranganna           | Drexel University College of Medicine                                                                                                              | 3                    |
| United States | Brian Gallay               | UC Davis Heart Center, University California-Davis Medical<br>Center, University of California, San Francisco (UCSF)-<br>Kidney Transplant Service | 3                    |
| United States | Harold Yang                | Central PA Transplant Foundation                                                                                                                   | 3                    |

| Country       | Investigator            | Affiliation                                                                                                | Patients enrolled, n |
|---------------|-------------------------|------------------------------------------------------------------------------------------------------------|----------------------|
| United States | Stanley Jordan          | Cedars-Sinai Medical Center                                                                                | 3                    |
| United States | Gaurav Gupta            | Virginia Commonwealth University, Virginia Commonwealth University Medical Center                          | 3                    |
| Austria       | Alexander Rosenkranz    | Universitätsklinikum Graz                                                                                  | 2                    |
| Germany       | Kai Lopau               | University of Wuerzburg                                                                                    | 2                    |
| Netherlands   | Luuk B. Hilbrands       | Radboud University Nijmegen Medical Centre                                                                 | 2                    |
| United States | Winfred W. Williams     | Massachusetts General Hospital                                                                             | 2                    |
| United States | Rafael Villicana        | Loma Linda University Medical Center (LLUMC), Children's Hospital, Transplantation Institute               | 2                    |
| United States | Fuad Shihab             | University of Utah, Department of Nephrology                                                               | 2                    |
| United States | Nelson B. Goes          | Swedish Medical Center, Swedish Organ Transplant and Liver Center                                          | 2                    |
| United States | Alexander Wiseman       | University of Colorado Denver                                                                              | 2                    |
| United States | Suphamai Bunnapradist   | UCLA Kidney Transplant Research Office                                                                     | 2                    |
| United States | Clifford Miles          | University of Nebraska Medical Center                                                                      | 2                    |
| France        | Bruno Moulin            | NOUVEL HÔPITAL CIVIL Service Néphrologie et Hémodialyse                                                    | 1                    |
| France        | Philippe Grimbert       | Centre Hospitalier Universitaire (CHU)—Hôpital Henri Mondor                                                | 1                    |
| France        | Denis Glotz             | Hôpital Saint Louis                                                                                        | 1                    |
| Germany       | Claudia Sommerer        | Nierenzentrum Heidelberg                                                                                   | 1                    |
| Norway        | Sadollah Abedini        | Vestfold Hospital Trust                                                                                    | 1                    |
| Sweden        | Lars Mjornstedt         | Sahlgrenska University Hospital                                                                            | 1                    |
| United States | Reginald Y. Gohh        | Rhode Island Hospital                                                                                      | 1                    |
| United States | Daniel Katz             | University of Iowa Health Care                                                                             | 1                    |
| United States | Hasan Ahmad Khamash     | Mayo Clinic Hospital                                                                                       | 1                    |
| United States | Anil S. Paramesh        | Tulane University Health Sciences Center                                                                   | 1                    |
| Argentina     | Carlos Antonio Balaguer | Hospital Español De Mendoza                                                                                | 0                    |
| Argentina     | Hugo S. Petrone         | Crai Sur                                                                                                   | 0                    |
| Austria       | Peter Neudorfer         | Krankenhaus der Elisabethinen Linz GmbH                                                                    | 0                    |
| Colombia      | Liliana Mesa            | Valle del Lili                                                                                             | 0                    |
| Colombia      | Carlos Benavides        | Fundación Cardioinfantil                                                                                   | 0                    |
| Colombia      | Paola Garcia            | Hospital Universitario San Ignacio                                                                         | 0                    |
| France        | Christophe Legendre     | Hôpital Necker et Université Descartes                                                                     | 0                    |
| Germany       | Christian Hugo          | Universitätsklinikum Carl Gustav Carus                                                                     | 0                    |
| Germany       | Martin Nitschke         | Universitätsklinikum Schleswig-Holstein, Campus Luebeck                                                    | 0                    |
| Germany       | Bjoern Nashan           | Universitätsklinikum Hamburg-Eppendorf<br>Klinik für Hepatobiliäre Chirurgie und Transplantationschirurgie | 0                    |
| Germany       | Markus van der Giet     | Charité Mitte, Transplantationszentrum Benjamin Franklin                                                   | 0                    |
| Germany       | Bernd Schroppel         | Universitätsklinikum Ulm                                                                                   | 0                    |

| Country       | Investigator             | Affiliation                                                                                    | Patients enrolled, n |
|---------------|--------------------------|------------------------------------------------------------------------------------------------|----------------------|
| Netherlands   | Frederike J. Bemelman    | Academic Medical Center                                                                        | 0                    |
| Netherlands   | Arjan D. Van Zuilen      | UMC Utrecht                                                                                    | 0                    |
| Norway        | Hallvard Holdaas         | OUS                                                                                            | 0                    |
| Sweden        | Lars Backman             | Uppsala University Hospital                                                                    | 0                    |
| Sweden        | Jonas Wadstrom           | Karolinska University Hospital                                                                 | 0                    |
| Switzerland   | Rudolf Wuethrich         | UniversitaetsSpital Zuerich (University Hospital Zurich)                                       | 0                    |
| Switzerland   | Karine Hadaya            | Geneva University Hospital, Department of Nephrology and Transplantation                       | 0                    |
| Switzerland   | Dela Golshayan           | CHUV                                                                                           | 0                    |
| United States | Sander Florman           | Recanati/Miller Transplantation Institute                                                      | 0                    |
| United States | Roy Bloom                | Penn Medicine, University of PA Health System                                                  | 0                    |
| United States | Viktor Bowers            | Tampa General Medicine Group                                                                   | 0                    |
| United States | Donald E. Hricik         | University Hospitals Cleveland Medical Center                                                  | 0                    |
| United States | Richard Fatica           | Cleveland Clinic                                                                               | 0                    |
| United States | Paul F. Gores            | Carolinas Medical Center                                                                       | 0                    |
| United States | Anil Chandraker          | Brigham and Women's Hospital                                                                   | 0                    |
| United States | Sundaram Hariharan       | University of Pittsburgh Medical Center                                                        | 0                    |
| United States | Bobby Nibhanupudy        | Florida Hospital Transplant Institute                                                          | 0                    |
| United States | Roslyn B. Mannon         | UAB Division of Nephrology                                                                     | 0                    |
| United States | Luis Campos              | Methodist University Hospital Transplant Institute                                             | 0                    |
| United States | Daniel Brennan           | Washington University School of Medicine                                                       | 0                    |
| United States | Anup Patel               | Saint Barnabas Medical Center                                                                  | 0                    |
| United States | Ronald Cotton            | Baylor College of Medicine, St Luke's Health System, Kidney Transplant Clinic                  | 0                    |
| United States | Anne Kruk                | Central Pharmacy                                                                               | 0                    |
| United States | John (Steve) Bynon       | Memorial Hermann—Texas Medical Center (TMC), The University of Texas Medical School at Houston | 0                    |
| United States | Mark Stegall             | Mayo Clinic                                                                                    | 0                    |
| United States | Neema Stephens           | University Transplant Center University of Texas—San Antonio                                   | 0                    |
| United States | Carlos F. Zayas-Montalvo | Medical College of Georgia at Augusta University                                               | 0                    |
| United States | Malcolm MacConmara       | UT Southwestern Medical Center                                                                 | 0                    |
| United States | Martin Mai               | Mayo Clinic                                                                                    | 0                    |

**Supplemental Table S1.** Baseline serum creatinine concentrations (mg/dL) by baseline eGFR and race.

| Group        | Race      | Baseline eGFR stratified groups (mL/min/1.73 m <sup>2</sup> ) |                               |           |                               |     |                               |
|--------------|-----------|---------------------------------------------------------------|-------------------------------|-----------|-------------------------------|-----|-------------------------------|
|              |           | <45                                                           |                               | 45 to <60 |                               | ≥60 |                               |
|              |           | n                                                             | Mean serum creatinine (mg/dL) | n         | Mean serum creatinine (mg/dL) | n   | Mean serum creatinine (mg/dL) |
| All patients | Black     | 17                                                            | 2.11 (0.21)                   | 20        | 1.62 (0.23)                   | 11  | 1.31 (0.15)                   |
|              | Non-Black | 141                                                           | 1.72 (0.27) <sup>a</sup>      | 163       | 1.35 (0.19)                   | 94  | 1.10 (0.14)                   |
| Belatacept   | Black     | 12                                                            | 2.06 (0.22)                   | 8         | 1.58 (0.24)                   | 4   | 1.34 (0.12)                   |
|              | Non-Black | 75                                                            | 1.72 (0.28)                   | 78        | 1.34 (0.18)                   | 46  | 1.11 (0.14)                   |
| CNI          | Black     | 5                                                             | 2.22 (0.15)                   | 12        | 1.64 (0.23)                   | 7   | 1.30 (0.17)                   |
|              | Non-Black | 66                                                            | 1.71 (0.27) <sup>a</sup>      | 85        | 1.37 (0.20)                   | 48  | 1.10 (0.14)                   |

Data are mean (SD) unless otherwise stated. CNI, calcineurin inhibitor; SD, standard deviation.

<sup>a</sup>For 1 patient, the observed values were recorded as SI units (umol/L) and were converted into US units (mg/dL)

**Supplemental Table S2.** Serum trough concentrations of tacrolimus and cyclosporine at study entry (all patients) and during the trial period (CNI continuation arm only).

|                                                                                       | n   | Tacrolimus <sup>a</sup><br>(ng/mL) | n  | Cyclosporine<br>(ng/mL) |
|---------------------------------------------------------------------------------------|-----|------------------------------------|----|-------------------------|
| <b>Baseline concentrations at study entry</b>                                         |     |                                    |    |                         |
| All patients                                                                          | 397 | 6.27 (2.31)                        | 48 | 104.89 (87.98)          |
| Belatacept conversion                                                                 | 199 | 6.35 (2.54)                        | 23 | 127.91 (109.73)         |
| CNI continuation                                                                      | 198 | 6.18 (2.05)                        | 25 | 83.71 (56.09)           |
| <b>Concentrations during the trial period (CNI continuation arm only)<sup>b</sup></b> |     |                                    |    |                         |
| Week 4                                                                                | 123 | 5.80 (1.73)                        | 22 | 93.31 (89.86)           |
| Week 12                                                                               | 129 | 5.88 (2.00)                        | 20 | 99.34 (82.74)           |
| Week 24                                                                               | 139 | 6.05 (3.49)                        | 17 | 107.18 (100.31)         |
| Week 36                                                                               | 134 | 5.82 (2.18)                        | 17 | 105.47 (79.16)          |
| Week 52                                                                               | 138 | 5.82 (2.50)                        | 19 | 106.62 (80.92)          |
| Week 76                                                                               | 111 | 5.96 (2.76)                        | 14 | 87.84 (16.62)           |
| Week 104                                                                              | 136 | 5.91 (3.06)                        | 15 | 80.89 (19.18)           |

Data are mean (SD). CNI, calcineurin inhibitor; SD, standard deviation.

<sup>a</sup>Pre-randomization baseline data were unavailable for one patient.

<sup>b</sup>Concentrations provided are for patients who received at least one study drug dose and had at least one pharmacokinetic sample post-baseline.

**Supplemental Table S3.** Patient and graft survival at 24 months in patient subgroups.

|                                                | <b>Belatacept Conversion</b> | <b>CNI Continuation</b> |
|------------------------------------------------|------------------------------|-------------------------|
| All patients                                   | 219/223 (98%)                | 217/223 (97%)           |
| Recipient sex                                  |                              |                         |
| Male                                           | 147/150 (98%)                | 147/151 (97%)           |
| Female                                         | 72/73 (99%)                  | 70/72 (97%)             |
| Recipient race                                 |                              |                         |
| White                                          | 187/191 (98%)                | 182/187 (97%)           |
| Black                                          | 24/24 (100%)                 | 24/24 (100%)            |
| Geographic region                              |                              |                         |
| North America                                  | 89/91 (98%)                  | 94/94 (100%)            |
| South America                                  | 35/35 (100%)                 | 33/37 (89%)             |
| Europe                                         | 95/97 (98%)                  | 90/92 (98%)             |
| Recipient age, yr                              |                              |                         |
| <50                                            | 79/80 (99%)                  | 79/83 (95%)             |
| ≥50                                            | 140/143 (98%)                | 138/140 (99%)           |
| Donor age, yr                                  |                              |                         |
| <50                                            | 108/110 (98%)                | 109/111 (98%)           |
| ≥50                                            | 111/113 (98%)                | 108/112 (96%)           |
| End stage renal disease (diabetes)             |                              |                         |
| Yes                                            | 36/38 (95%)                  | 29/30 (97%)             |
| No                                             | 183/185 (99%)                | 188/193 (97%)           |
| Initial CNI treatment                          |                              |                         |
| Cyclosporine                                   | 22/23 (96%)                  | 23/25 (92%)             |
| Tacrolimus                                     | 197/200 (98%)                | 194/198 (98%)           |
| Baseline eGFR (mL/min/1.73 m <sup>2</sup> )    |                              |                         |
| <45                                            | 87/87 (100%)                 | 68/71 (96%)             |
| 45–<60                                         | 84/86 (98%)                  | 94/97 (97%)             |
| ≥60                                            | 48/50 (96%)                  | 55/55 (100%)            |
| Time from transplantation to randomization, mo |                              |                         |
| 6–12                                           | 69/70 (99%)                  | 67/70 (96%)             |
| >12                                            | 150/153 (98%)                | 150/153 (98%)           |

Data are n/N (%), where n refers to the number of events (patients surviving with functional grafts) and N refers to the number of patients within the subgroup.

CNI, calcineurin inhibitor; eGFR, estimated glomerular filtration rate.



**Supplemental Table S4.** BPAR at 24 months in patient subgroups.

|                                                | <b>Belatacept Conversion</b> | <b>CNI Continuation</b> |
|------------------------------------------------|------------------------------|-------------------------|
| All patients                                   | 18/223 (8%)                  | 9/223 (4%)              |
| Recipient sex                                  |                              |                         |
| Male                                           | 11/150 (7%)                  | 5/151 (3%)              |
| Female                                         | 7/73 (10%)                   | 4/72 (6%)               |
| Recipient race                                 |                              |                         |
| White                                          | 14/191 (7%)                  | 7/187 (4%)              |
| Black                                          | 3/24 (12%)                   | 2/24 (8%)               |
| Geographic region                              |                              |                         |
| North America                                  | 7/91 (8%)                    | 2/94 (2%)               |
| South America                                  | 1/35 (3%)                    | 3/37 (8%)               |
| Europe                                         | 10/97 (10%)                  | 4/92 (4%)               |
| Recipient age, yr                              |                              |                         |
| <50                                            | 5/80 (6%)                    | 6/83 (7%)               |
| ≥50                                            | 13/143 (9%)                  | 3/140 (2%)              |
| Donor age, yr                                  |                              |                         |
| <50                                            | 4/110 (4%)                   | 4/111 (4%)              |
| ≥50                                            | 14/113 (12%)                 | 5/112 (4%)              |
| End stage renal disease (diabetes)             |                              |                         |
| Yes                                            | 3/38 (8%)                    | 1/30 (3%)               |
| No                                             | 15/185 (8%)                  | 8/193 (4%)              |
| Initial CNI treatment                          |                              |                         |
| Cyclosporine                                   | 0/23 (0)                     | 1/25 (4%)               |
| Tacrolimus                                     | 18/200 (9%)                  | 8/198 (4%)              |
| Baseline eGFR (mL/min/1.73 m <sup>2</sup> )    |                              |                         |
| <45                                            | 8/87 (9%)                    | 3/71 (4%)               |
| 45–<60                                         | 6/86 (7%)                    | 4/97 (4%)               |
| ≥60                                            | 4/50 (8%)                    | 2/55 (4%)               |
| Time from transplantation to randomization, mo |                              |                         |
| 6–12                                           | 6/70 (9%)                    | 3/70 (4%)               |
| >12                                            | 12/153 (8%)                  | 6/153 (4%)              |

Data are n/N (%), where n refers to the number of events (BPAR) and N refers to the number of patients within the subgroup.

BPAR, biopsy-proven acute rejection; CNI, calcineurin inhibitor; eGFR, estimated glomerular filtration rate.

**Supplemental Table S5.** Improvement from baseline in eGFR.<sup>a</sup>

|                 | <b>Belatacept Conversion<br/>(n=223)</b> | <b>CNI Continuation<br/>(n=223)</b> |
|-----------------|------------------------------------------|-------------------------------------|
| 12 months       |                                          |                                     |
| 5% improvement  | 119 (53)                                 | 64 (29)                             |
| 10% improvement | 98 (44)                                  | 48 (22)                             |
| 24 months       |                                          |                                     |
| 5% improvement  | 121 (54)                                 | 66 (30)                             |
| 10% improvement | 108 (48)                                 | 49 (22)                             |

Data are n (%).

CNI, calcineurin inhibitor; eGFR, estimated glomerular filtration rate.

<sup>a</sup>Values with imputation were identical to those without imputation.

**Supplemental Table S6.** Urine protein-to-creatinine ratio at baseline and at month 24.

| Urine protein (mg)/<br>creatinine (mg) | Belatacept Conversion<br>(n=223) |               | CNI Continuation<br>(n=223) |               |
|----------------------------------------|----------------------------------|---------------|-----------------------------|---------------|
|                                        | Baseline                         | Month 24      | Baseline                    | Month 24      |
| <0.5                                   | 218/222 (98%)                    | 166/188 (88%) | 215/221 (97%)               | 157/169 (93%) |
| 0.5–1.0                                | 4/222 (2%)                       | 17/188 (9%)   | 4/221 (2%)                  | 8/169 (5%)    |
| >1.0                                   | 0                                | 5/188 (3%)    | 2/221 (1%)                  | 4/169 (2%)    |
| Missing                                | 1/223 (<1%)                      | 35/223 (16%)  | 2/223 (1%)                  | 54/223 (24%)  |

Data are n/N (%), where N refers to the denominator used to calculate the percentages.

CNI, calcineurin inhibitor.

**Supplemental Table S7.** Impact on donor-specific antibodies.

|                                     | Belatacept Conversion<br>(n=207) |          |                   |         | CNI Continuation<br>(n=199) |          |                   |             |
|-------------------------------------|----------------------------------|----------|-------------------|---------|-----------------------------|----------|-------------------|-------------|
|                                     | Class I                          | Class II | Class I<br>and II | Total   | Class I                     | Class II | Class I<br>and II | Total       |
| Pre-existing<br>DSAs at<br>baseline | 3 (1%)                           | 10 (5%)  | 3 (1%)            | 10 (5%) | 15 (8%)                     | 13 (7%)  | 2 (1%)            | 26<br>(13%) |
| <i>De novo</i> DSAs                 |                                  |          |                   |         |                             |          |                   |             |
| Month 12                            | 2 (1%)                           | 0        | 0                 | 2 (1%)  | 4 (2%)                      | 8 (4%)   | 3 (2%)            | 9 (5%)      |
| Month 24                            | 2 (1%)                           | 0        | 0                 | 2 (1%)  | 6 (3%)                      | 12 (6%)  | 4 (2%)            | 14 (7%)     |

Data are n (%).

CNI, calcineurin inhibitor; DSA, donor-specific antibody.



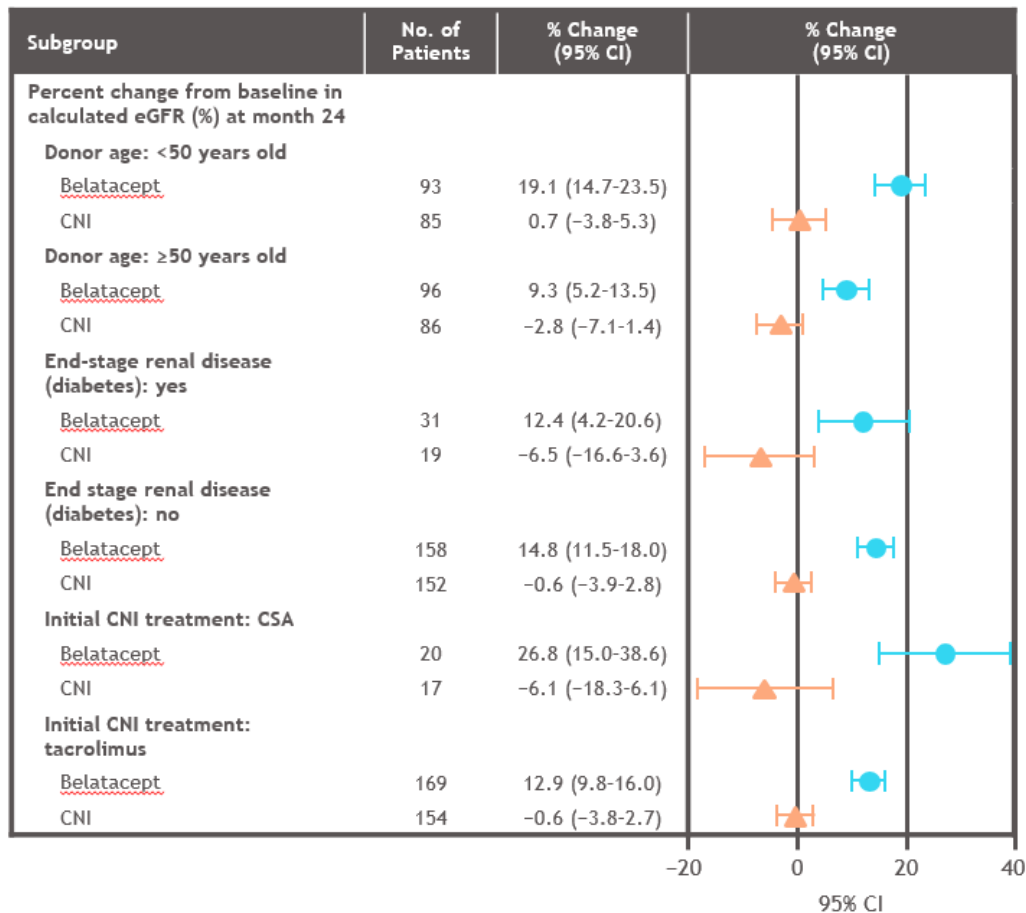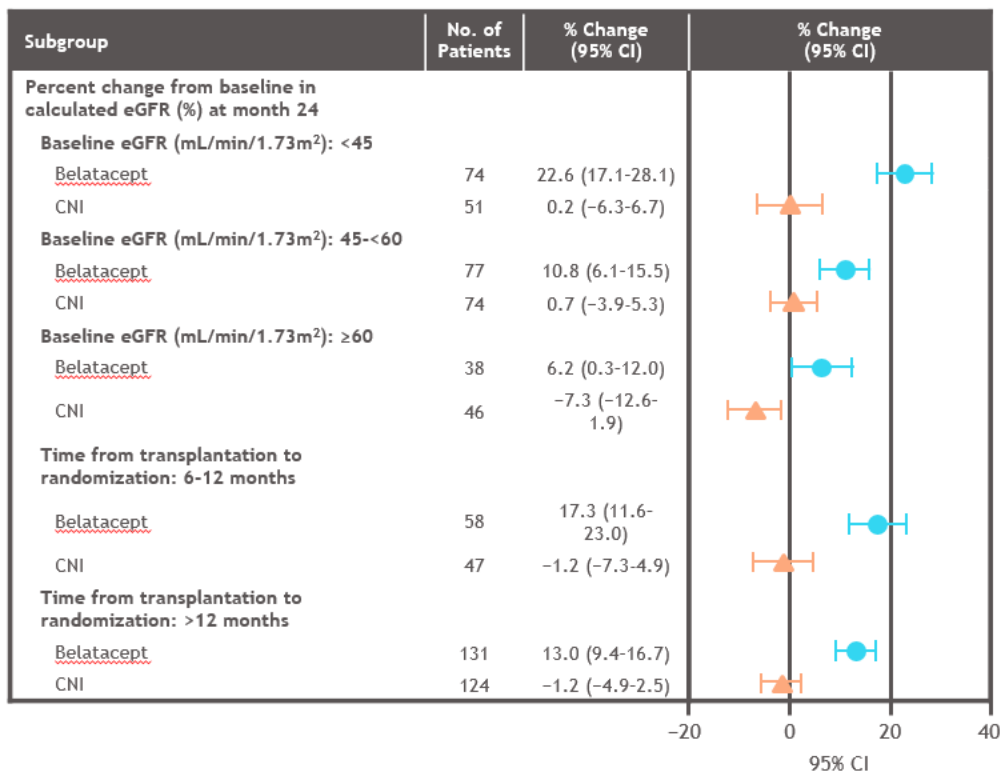

**Supplemental Figure S2.** Impact of BPAR on eGFR over time with imputation. Values missing due to death or graft loss were imputed as zero.

BPAR, biopsy-proven acute rejection; CNI, calcineurin inhibitor; eGFR, estimated glomerular filtration rate.

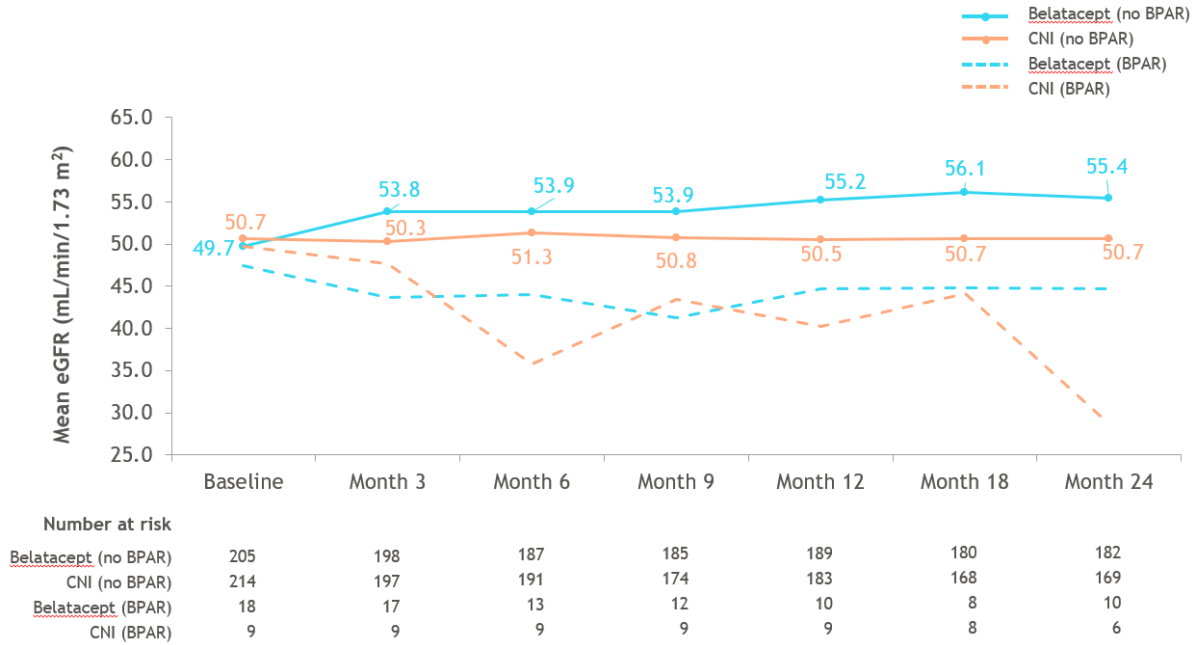

Supplement: ASN.2021050628SupplementaryData.pdf [file ASN.2021050628SupplementaryData.pdf]
